## Manuscript

1 **Title:** Development of a novel protein identification approach to define mitochondrial  
2 proteomic signatures in glioblastoma oncogenesis: T98G vs U87MG cell lines model.

3  
4 **Authors:** Leopoldo Gómez-Caudillo<sup>a</sup>, Ángel G. Martínez-Batallar<sup>a</sup>, Ariadna J. Ortega-  
5 Lozano<sup>a</sup>, Diana L. Fernández-Coto<sup>b</sup>, Haydee Rosas-Vargas<sup>c</sup>, Fernando Minauro-  
6 Sanmiguel<sup>c\*</sup>, Sergio Encarnación-Guevara<sup>a\*</sup>.

7  
8 **Author addresses:**

9 <sup>a</sup> Centro de Ciencias Genómicas, UNAM. Av. Universidad s/n, Col. Chamilpa, CP 62210,  
10 Cuernavaca, Morelos, México.

11 <sup>b</sup> Instituto Nacional de Salud Pública. Av. Universidad 655, Col. Santa María Ahuacatitlán,  
12 CP 62100, Cuernavaca, Morelos, México.

13 <sup>c</sup> Unidad de Investigación Médica en Genética Humana, Hospital de Pediatría, Centro  
14 Médico Nacional Siglo XXI, IMSS. Av. Cuauhtémoc 330, Col. Doctores, CP 06720,  
15 CdMx, México.

16

17 **Corresponding authors:**

18 \* Sergio Encarnación-Guevara email: [encarnac@ccg.unam.mx](mailto:encarnac@ccg.unam.mx)

19 Tel: +52 777 3291899.

20 \* Fernando Minauro-Sanmiguel email: [misaf73@hotmail.com](mailto:misaf73@hotmail.com)

21 Tel: +52 55 56276900 ext. 21941.

22 **Keywords:** Glioblastoma, Mitochondria, 2DE, Random Sampling, Principal Components  
23 Analysis, Proteomic Signature, Metabolic change.



## 25 **Abstract**

26           Glioblastoma Multiforme is a cancer type with an important mitochondrial  
27 component. Here was used mitochondrial proteome Random Sampling in 2D gels from  
28 T98G (oxidative metabolism) and U87MG (glycolytic metabolism) cell lines to obtain and  
29 analyze representative spots (regardless of their intensity, size, or difference in abundance  
30 between cell lines) by Principal Component Analysis for protein identification. Identified  
31 proteins were ordered into specific Protein-Protein Interaction networks, to each cell line,  
32 showing mitochondrial processes related to metabolic change, invasion, and metastasis; and  
33 other nonmitochondrial processes such as DNA translation, chaperone response, and  
34 autophagy in gliomas. T98G and U87MG cell lines were used as glioblastoma transition  
35 model; representative proteomic signatures, with the most important biological processes in  
36 each cell line, were defined. This pipeline analysis describes the metabolic status of each  
37 line and defines clear mitochondria performance differences for distinct glioblastoma  
38 stages, introducing a new useful strategy for the understanding of glioblastoma  
39 carcinogenesis formation.

40

## 41 **Biological significance**

42           This study defines the mitochondria as an organelle that follows and senses the  
43 carcinogenesis process by an original proteomic approach, a random sampling in 2DE gels  
44 to obtain a representative spots sample and analyzing their relative abundance by Principal  
45 Components Analysis; to faithfully describe glioblastoma cells biology.

46

## 47 **Introduction**

48           Pediatric solid brain tumors are the most common Central Nervous System  
49 neoplasia in childhood and the second most common before 20 years old [1]. In particular,  
50 Glioblastoma Multiforme (GbM) or grade IV astrocytoma is the most common and lethal  
51 adult malignant brain tumor [2], while in pediatric population GbM occurred only in 8-12%  
52 of the population. Nevertheless, in both populations gliomas are characterized by their  
53 aggressive medical behavior, a significant amount of morbidity and high mortality rate [3].  
54 GbM is difficult to classify because they diverge considerably in morphology, location,  
55 genetic alterations and low consensus among pathologists in their classification [4]. The  
56 characterization of gliomas tumors heterogeneity is a priority for the development of better  
57 and more precise diagnostic, prognostic and therapy biomarkers.

58 Mitochondria, the “power house” of the cell, are abundant in brain tissue; its biogenesis,  
59 mitophagy, migration, and morphogenesis are crucial in brain development and synaptic  
60 pruning. Mitochondria also affect brain susceptibility to injury, play a part in innate  
61 immunity, inflammation in response to infection and acute damage, also in antiviral and  
62 antibacterial defense [5]. Due to mitochondria play a critical role in numerous bioenergetic,  
63 anabolic and cell biochemical pathways [6,7], genetic and metabolic alterations in  
64 mitochondria have been suggested to be the cause, or contributing factors, of pathogenesis  
65 in a broad range of human diseases, including cancer [8,9]. Several common features of  
66 tumor cells can result from mitochondrial deregulation. Furthermore, mitochondria biology  
67 support cell transformation during carcinogenesis [10,11], suggesting that its proteome is  
68 versatile and that sense the spatial and temporal dynamics of the cell biological processes,  
69 from the onset to the end of cancer. Although these advances, the specific role of  
70 mitochondria in cancer has not been completely understood, mainly because the huge

71 amount of information about mitochondrial processes in cancer has not been properly  
72 integrated.

73 Despite the utility of proteomics research to get insights into biological processes of  
74 cancer disease and knowledge into neuro-oncology, few proteomic studies in gliomas have  
75 been performed to date; the few of them are characterized by the elaboration of lists of  
76 proteins found to be, either, up or down-regulated in tissue specimens compared to normal  
77 brain. This glut of proteomic data generated has been without a unitary approach to  
78 establish the feasibility of the existence of key proteins and/or specific signaling pathways  
79 regulating cancer development. So far, most of the data generated is lacking coherence,  
80 validity, reproducibility and comparability. The problem arises mainly because of the  
81 methodological and analytical limitations, and statistical approaches deficiencies. Even  
82 more, a lot of the identified proteins in such studies are irrespective of the nature of the  
83 background disease [12–14]. Thus, there is the need for proteomic studies in GbM that  
84 generate reliable data to be translated into clinical biomarkers, which contribute to  
85 improving patient diagnosis and therapies.

86 To help the understanding of mitochondrial role in the carcinogenesis of GbM, a  
87 proteomic signature, related to the biological processes characterizing two stages of cancer  
88 disease, was performed by using T98G and U87MG glioblastoma cell lines; which  
89 resemble the metabolic transition (Warburg effect) from mitochondrial OXPHOS to  
90 glycolysis, as reported during tumorigenesis [15]. Furthermore, a pipeline for functional  
91 analysis of differentially expressed proteins in these cell lines was developed. Thus, a  
92 Random Sampling (RS) and Principal Component Analysis (PCA), on 2D IEF/SDS- PAGE  
93 mitochondrial proteome gels, were performed to evaluate spots abundance and get a  
94 representative spots sample for protein identification by MALDI-TOF. Also, PPI networks

95 extension and GOs enrichment analysis were performed to get a metabolism systemic point  
96 of view for T98G and U87MG glioblastoma cells. Our results imply that mitochondria are a  
97 definitive and unique cancer sensing organelle for cancer development and the elaboration  
98 of therapeutic targets.

99

## 100 **Material and Methods**

### 101 Cell culture

102 T98G (ATCC<sup>®</sup> CRL-1690<sup>™</sup>) and U87MG (ATCC<sup>®</sup> HTB-14<sup>™</sup>) cell lines were  
103 maintained in 175 cm<sup>2</sup> plastic flasks (37°C, 5% CO<sub>2</sub>) in EMEM medium supplemented with  
104 10% fetal bovine serum (FBS). Cells were harvested with trypsin (80-90%) in confluence  
105 with trypsin. Washed twice in PBS and used for mitochondria extraction.

106

### 107 Mitochondria isolation

108 The mitochondria were isolated by differential centrifugation. Cells were disrupted  
109 separately in 250 mM sucrose, 1 mM EGTA, 10 mM HEPES, pH 7.4 at 4°C and  
110 centrifuged for 10 min at 1500 x g and 4°C to recover the supernatant. This step was  
111 repeated three times. Subsequently, all supernatants were pooled and centrifuged for 10 min  
112 at 12000 x g and 4°C to obtain a mitochondrial pellet. The pellets were used immediately or  
113 kept at -80°C until use.

114

### 115 Mitochondrial proteome extraction

116 T98G and U87MG mitochondrial-associated proteins were obtained according to  
117 Hurkman's protocol modified as follows: Each mitochondrial pellet was resuspended with  
118 500 µl of extraction buffer (0.7 M sucrose, 0.5 M Tris-Base, 0.1 M KCl, 0.03 M HCl, 0.05

119 M EDTA and 2%  $\beta$ -mercaptoethanol and saturated phenol (500  $\mu$ l) and incubated for 20  
120 min at  $-20^{\circ}\text{C}$ . Then, mitochondrial samples were centrifuged 10 min at 400 x g,  $4^{\circ}\text{C}$  and  
121 the phenolic phase was recovered after (12 to 15h at  $-20^{\circ}\text{C}$ ) 0.1 M ammonium acetate  
122 addition. Then, mitochondrial samples were washed twice with ammonium acetate 0.1 M  
123 and centrifuged (4000 x g, 10 min,  $4^{\circ}\text{C}$ ). Pellets containing mitochondrial proteins were  
124 washed with 1 ml of 80% acetone and centrifuged (4000 x g, 10 min,  $4^{\circ}\text{C}$ ). Supernatants  
125 were discarded, and pellets were resuspended in IEF buffer (7 M urea, 2 M thiourea and  
126 0.06 M DTT, 2% ampholytes (3–10 pH) and 4% CHAPS), centrifuged (8000 x g, 30 min  
127  $4^{\circ}\text{C}$ ) [16]. Obtained supernatants were recovered and frozen at  $-80^{\circ}\text{C}$  until use for 2D  
128 electrophoresis. 2-DE gels

129 Each gel (3 T98G and 3 U87MG) was loaded with 500  $\mu$ g of protein, quantified by  
130 Bradford's method. IEF was performed in acrylamide gel tubes as in [17], briefly gel tubes  
131 were prefocused (2500 v, 110uA, 1hr, and 250/hr, per gel), before IEF (125 V, 22 hr). The  
132 electrofocused gels were run into a 2D-SDS PAGE (12%) for additional spot separation.  
133 2D gels were fixed and stained with colloidal Coomassie brilliant blue R-250 for image  
134 acquisition.

135

136 Image pre-processing

137 Gels were scanned in a GS-800 densitometer (Bio-Rad, Hercules, CA) and six  
138 images were acquired, wrapped and overlapped with PdQuest 8.0.1 software (Bio-Rad).  
139 Next, with all six images mixed, a master gel was created by the default PdQuest algorithm  
140 from the sum of the intensity of all spots in gel images.

141

## 142 Random sampling of spots in master gel

143 To increase the protein capacity to represent and to describe the cellular processes  
144 that are carried out in T98G and U87MG cell lines, we randomly selected 400 spots (of  
145 1274 detected by PdQuest) from the master gel, regardless of their size, intensity or  
146 abundance difference between cell lines. With the R V3.4 [18] help, a list of 400 random  
147 numbers between 1 and 1274 (the number of spots in the master gel) with uniform  
148 distribution was generated, which was the number of spots in the master gel. This process  
149 ensures that every spot in master gel has an equal chance of being selected and allows to  
150 obtain a representative mitochondrial proteome sample [19]. This spot sample was  
151 rematched in all gels image to get a more reliable abundance analysis [14].

## 152 Multivariate analysis of spots intensity

153 To select the spots to be identified, a spreadsheet with the normalized intensity of  
154 the 400 spots sampled was exported from PdQuest. The spots abundance was  
155 logarithmically transformed and missing values imputed by Random Forest method with  
156 the R package RandomForest [20] to perform the multivariate analysis.  
157 The abundance analysis was performed by principal components analysis (PCA) from the  
158 correlation matrix of spots intensity with the R package ade4 [21], to get a spot abundance  
159 pattern for the cell lines gels [14]. To know if any component could distinguish between the  
160 cell lines, the gels score for each component were plotted. Having found the component,  
161 with discriminatory capacity, we identified the significant spots in that component with the  
162 square cosine of the correlation matrix between the components and the spots. The  
163 abundance pattern was obtained by plotting the mean of the logarithm of the intensity of the  
164 significant spots between cell lines [22].

165



## 166 Mass spectrometry

167       Each selected spot were cut from gel, alkylated, reduced, digested and automatically  
168 transferred to MALDI analysis target by a Proteineer SP II and SP robot using the  
169 SPcontrol 3.1.48.0 v software (Bruker Daltonics, Bremen, Germany), with the aid of a DP  
170 Chemicals 96 gel digestion kit (Bruker Daltonics) and processed in a MALDI-TOF  
171 Autoflex (Bruker Daltonics) to obtain the peptide mass fingerprints. One hundred  
172 satisfactory shots in 20 short steps were performed, the peak resolution threshold was set at  
173 1,500, the signal/noise ratio of tolerance was 6, and contaminants were not excluded. The  
174 spectrum was annotated by the flexAnalysis 1.2 v SD1 Patch 2 (Bruker Daltonics). The  
175 search engine MASCOT [23] was used to compare the fingerprints against the SwissProt  
176 [24] release 2016 database with the following parameters: Taxon-Human, mass tolerance of  
177 up to 200 ppm, one miss-cleavage allowed, and as the fixed modification Carbamidomethyl  
178 and oxidation of methionine as the variable modification.

179       The mass spectrometry proteomics data have been deposited to the  
180 ProteomeXchange Consortium via the PRIDE [25] partner repository with the dataset  
181 identifier PXD008540.

182

## 183 Mitochondrial proteins identification

184       Identified protein gene was tested against MitoMiner database, which stores a  
185 collection of genes that encode proteins with strong mitochondrial localization evidence  
186 from 56 published large-scale GFP tagging and mass-spectrometry studies [26], to check  
187 mitochondrial membership.

188

## 189 Basic protein-protein interaction (PPI) net construction

190 Initial PPI nets were built accords to STRING application [27]. A net was obtained  
191 for T98G and another for U87MG with overexpressed and specific proteins in each cell line  
192 as bait nodes and adding edges with the following basic settings: Organism > Homo  
193 sapiens; meaning of network edges > evidence; active interactions source > Experiments  
194 and Databases; minimum required interaction score > medium confidence (0.400); max  
195 number of interactions to show, 1st shell > none, 2nd shell none.

196

#### 197 Significant biological process identification

198 To know the more critical biochemical processes that are taking place in each cell  
199 line. First, the initial PPIs were amplified in STRING, with the previous parameters but  
200 increasing three times the initial net in the first shell to add proteins and interactions that  
201 increase the representativeness of the cellular processes specific to each line. Next, we  
202 performed a comparative enrichment analysis based on Gene Ontology [28] of biological  
203 processes sets from extended PPI nets. Enrichment was done employing the Cytoscape [29]  
204 overrepresentation plugin, Biological Networks Gene Ontology (BiNGO) [30]. As input,  
205 we uploaded the UniProt protein identifiers of all the elements in the initial PPI net first and  
206 extended net later. The biological processes shown in this paper are exhaustive, that is, we  
207 tried to avoid nested processes within other more general.

208

#### 209 Western blot analysis

210 The results validation was done through OXPHOS proteins immunodetection (Wb)  
211 of OXPHOS proteins and bioenergetic signature. Mitochondrial extracts were obtained  
212 from 6 million T98G and U87MG cells. These were subjected to SDS-PAGE 12% system  
213 described in Laemmli (1970) [31]. Gels ran for 2h at 100V. Proteins separated by SDS-

214 PAGE were transferred to PVDF membrane, as described in Towbin (1979) [32], at 100V  
215 for 1h; an antibody against a subunit of each OXPHOS complex: NDUFA10, CI (1:2000);  
216 subunit 70 kDa, CII (1: 10000); core 2, CIII (1:4000); subunit IV, CIV (1:1000) and beta  
217 subunit ATP synthase or CV(1:1000) was tested. The reaction bands were detected by  
218 chemiluminescent (Millipore, WBKLS0500) and read on to C-Digit Blot Scanner (LI-  
219 COR).

220

## 221 **Results**

### 222 *Spot selection by Random Sampling and Principal Component Analysis.*

223 Three of the 400 spots selected across all gels surface, regardless size, intensity or  
224 difference in abundance between cell lines, did not pass the quality control; 161 spots were  
225 specific for T98G or U87MG. Therefore, the PCA was applied to 236 spots shared by both  
226 lines (Supplementary Table 1). According to the PCA, the total variation in the spots  
227 abundance in all gels can be explained by five principal components (Fig. 1A). The first  
228 component (PC1) holds 63% of whole explained variance (Fig 1B) while the others four  
229 components together explain only the 37% of the variance remaining. PC1 also distinguish  
230 between T98G and U87MG gels (Fig. 1C). 165 spots from CP1 were selected according to  
231 its relative importance between components (square cosine of the correlation matrix  
232 between the components and the spots (Supplementary Table 2)) to MALDI-TOF  
233 identification, 114 of them show a positive correlation and 51 a negative one  
234 (Supplementary Table 3). The first set of spots showed more mean abundance in T98G and  
235 smaller in U87MG, different than the second set, which is more abundant in U87MG (Fig.  
236 1D). 20 specific spots in T98G and 20 in U87MG (randomly selected too) were added.

237

## 238 *T98G and U87MG landscapes*

239 As a result of Random Sampling and the PCA 89 identified spots (Supplementary  
240 Table 4) had a homogeneous distribution in T98G and U87MG gels (Figs. 2A and 2B),  
241 unrelated to size, intensity or difference in abundance between cell lines, assuring the  
242 representativeness of whole mitochondrial proteome in these lines.

243 Since mitochondria are multifunctional organelles, proteins with different origin can  
244 colocalize in them. The identified protein dataset was compared against MitoMiner  
245 database to recognize mitochondrial proteins. We found that T98G show more  
246 mitochondrial proteins (72%, 24 proteins) than U87MG (44%,15 proteins). “Foreign”  
247 proteins were located in Cytoplasm, Plasmatic Membrane, Endoplasmic Reticulum, Golgi,  
248 and Nucleus according to GeneCards Suite [33] (Fig. 2C).

249 The initial mitochondrial proteome PPI networks were built with 66 proteins  
250 represented by the 89 identified entities. In T98G, 33 proteins (29 proteins more  
251 overexpressed and 4 specifics). U87MG initial PPI network groups 33 proteins (28 more  
252 abundant and 5 own) (circles in Figs. 3A and 3B).

253 To get a better landscape of mitochondrial function in each cell line, initial PPI  
254 networks were extended (Squares in Figs. 3A and 3B) resulting in a T98G extended PPI  
255 network (Fig. 3A) where mitochondrial processes dominant showing functional  
256 mitochondria. One of the best-represented processes here is the “Generation of precursor  
257 metabolites and energy” process (p-value 2.4E-52, Fig. 3C) with OXPHOS (UCRI, QCR1,  
258 QCR2, NUDS1 and NUDS3) and ATPB y ATP5H proteins included, coupled with the  
259 “Oxygen and reactive oxygen species metabolic process” (p-value 7.6E-03, Fig. 3C) and  
260 “Tricarboxylic Acid Cycle” (p-value 4.1E-06, Fig. 3C) represented by ACON, SDHA,  
261 DHE3, SERA and 3HIDH. Another of the process present in the T98G network is the

262 “Nitrogen compound metabolic process” (p-value 3.0E-05, Fig. 3C), which connects with  
263 OXPHOS through “Transmembrane transport” process (p-value 7.4E-08, Fig. 3C) and CH60  
264 and HS71A proteins. This process is also chained with “Negative regulation of apoptosis”  
265 (p-value 6.9E-02, Fig. 3C) and “Protein folding” (p-value 3.9E-13, Fig. 3C) proteins. It is  
266 interesting that other cellular process without enough statistical representation let see  
267 different typical mitochondrial pathways like  $\beta$ -oxidation, represented by EC11 (Fig. 3C).  
268 U87MG extended PPI network (Fig. 3B) shows many differences with that of T98G.  
269 Although this net is more fractionated, it is possible to recognize some enriched biological  
270 process. One of the more remarkable, found in carcinogenesis, is the change on energetic  
271 metabolism, represented by “Glycolysis” (p-value 3.6E-13, Fig. 3D) proteins ENOA,  
272 PGAM1 and TPIS, “Generation of precursor metabolites and energy” (p-value 1.2E-06,  
273 Fig. 3D)” and “Small molecule catabolic process“ (p-value 1.3E-06, Fig. 3D).

274 “Cellular component movement” (p-value 2.3E-02, Fig. 3D) and Cellular response  
275 to oxidative stress” (p-value 8.1E-02, Fig. 3D) processes, related to cell proliferation and  
276 invasive cell capacity, were found in U87MG. Also, it were found “Translational  
277 elongation” process (p-value 1.0E-51, Fig. 3D), that groups EF2 y EF1G proteins and  
278 “Protein folding”, (p-value 4.1E-11, Fig. 3D), which are related to an increased protein  
279 translation for augment biomass since many of them are molecular chaperones (HSP7C,  
280 TCPB, TPCQ). This U87MG landscape shows mitochondria with modified cellular and  
281 metabolic functions and many interactions with ER and Golgi body (Figs. 2C and 3B),  
282 suggesting that mitochondria readjust its cellular process according to carcinogenesis  
283 needs.

284 To know if any biological process is grouping the most abundant proteins, a k-  
285 means analysis was performed. The proteins were classified, in function of its relative

286 abundance, as little, regular or very abundant (small, medium and large circles respectively  
287 in Figs. 3A and 3B). We found low, regular and very abundant proteins in all biological  
288 processes in both cell lines; showing no correlation between the overrepresentation of some  
289 biological process and the abundance of the proteins that represent it.

290

### 291 *Protein and biological process validation for mitochondrial proteomic signature*

292 Due to “Generation of precursor metabolites and energy process” was one of the  
293 best-represented processes in T98G (p-value 2.4E-52) and U87MG (p-value 1.2E-06), the  
294 OXPHOS protein expression (I-IV complexes plus ATP synthase) was verified on both cell  
295 lines by WB assays. A clear diminished OXPHOS system expression in U87MG cells was  
296 found (Fig. 4A). Also, as “Glycolysis” was the most enhanced process in U87MG (3.6E-  
297 13), the bioenergetic signature was assayed too (Fig. 4B). The results support OXPHOS  
298 expression finding since U87MG cells expressed more glycolytic proteins comparing to  
299 T98G, where OXPHOS system is dominating. This result confirmed PPI networks built on  
300 the basis to random sampling and PCA analysis.

301

## 302 **Discussion**

303 Besides ATP synthesis mitochondrion is a multifunction organelle, which is  
304 involved in many cellular processes. Mitochondria proteome is versatile and reacts to  
305 different cellular conditions; many complex diseases including cancer show a  
306 mitochondrial roll. The best-known mitochondrial change in cancer is Warburg effect: an  
307 energetic metabolism shift to glycolysis, as a mean energy source, instead of mitochondrial  
308 OXPHOS. It used to be believed that Cancer cells were related to mitochondrial  
309 dysfunction. However, in some cancer types, exist enough evidence showing complete

310 functional mitochondria, able to follow cellular transformation[15]. Nowadays, it has  
311 believed that mitochondria follow cancer development sensing and regulating different  
312 molecular signals [34–36]. Thus, there are many mitochondrial proteins or mitochondrial  
313 processes that could be clinical targets or biomarkers.

314 Our results describe two well-differentiated states from mitochondrial proteome  
315 data. Our analysis by RS on 2D SDS PAGE and spot abundance by PCA, allow the  
316 detection of mitochondrial and cellular pathways distinguished. The data are in resonance  
317 with biochemical and proteomic evidence [12,13]. Our approach renders a landscape close  
318 to molecular cancer dynamics according to published evidence on glioblastoma biology and  
319 systematics [15,37–39], enabling to raise a proteomic signature for T98G and U87MG  
320 glioblastoma cells with the best representative biological process according to each  
321 mitochondrial proteome. PCA raise five components, the first component explains 63 % of  
322 total variation in spot abundance data and have proteins that distinguish between T98G and  
323 U87MG cells. PC1 could be renamed as "Energy metabolism shift" since it represents  
324 many of the processes involved in the Warburg effect.

325 Random spot selection and PCA from direct experimental data before identification  
326 point out a specific PPI network for T98G and U87MG cells, where the energetic metabolic  
327 shift to glycolysis as the mean ATP source occurs. U87MG cells represent an advanced,  
328 invasive and malignant cancer state vs T98G cells, which represent an earlier state with  
329 OXPHOS metabolism. According to our PPIs, T98G cells show typical mitochondrial  
330 functions (OXPHOS, TCA, lipid metabolism, etc.) but also another more cancer-related  
331 process (Apoptosis evasion, proliferation with SYF2, HSPA8, amino acids metabolism  
332 with (GLUD1, 3HIDH); or chaperon response. On the other hand, U87MG cells show

333 promiscuous interactions with ER and Nucleus, a maintained chaperone response and DNA  
334 translation to proteins, a very advanced state with invasion-related proteins.

335         This characterization could define different cancer state or intervals and works for  
336 other cancer types too. On this way, T98G cells could represent an earlier cancer state with  
337 a molecular landscape similar to “oxidative tumors”, where ATP comes from OXPHOS  
338 system fueled by lipid (EC11, GPD2) and amino acids metabolisms, like glutamine  
339 (GLUD1), as it has been observed in some glioblastoma cases [15,40]. U87MG shows a  
340 very different state, in which glycolysis is well represented (ENOA, TPIS, PGAM1),  
341 supposing an enhanced Warburg effect. Also, oxidative stress response as is has been  
342 reported [13,41] and many non-mitochondrial but close cancer-related proteins reported in  
343 advanced tumors [42]. U87MG mitochondria show mobility or migration proteins related  
344 to the cytoskeleton (VIME, ACTB, MSN, TPM3), and vesicle formation (RAB1B,  
345 RAB2B, LMAN2). Another less frequent processes were well represented such as DNA  
346 translation (EF2, EF1G) into proteins; this increase could be associated to biomass increase  
347 or metabolic energy source, since many proteins folding chaperones (TCPQ, TCPB) were  
348 observed.

349         Our procedure for protein analysis enables us to determine various simultaneous cell  
350 processes besides metabolic shifting. A remarkable glioblastoma molecular feature is the  
351 chaperones response, where some biomarkers [43] or therapy targets [44] could be found.  
352 Here are presented TRAP1 (HSP90 homologous), GRP78, GRP75 and HSPB1 proteins  
353 able to regulate some mitochondrial metabolic pathways and stabilize cancer cells through  
354 apoptosis evasion [45]; or could be involved in drug surveillance [38].

355         The finding of non-mitochondrial proteins in our study is not a surprise. Basal  
356 mitochondria function includes the interaction with other cell organelles, mainly ER and



357 the Nucleus. Our data show some nuclear (SRY) or ER (CALU, CO6A1) proteins. In  
358 U87MG cells there are more interactions between these proteins, suggesting a specificity of  
359 these interactions on advanced cancer. This landscape resembles autophagy, a central  
360 process in advanced states of cancer, which enable cancer cell surveillance because of the  
361 recycling of metabolites and nutrients [46,47]. In addition, there are proteins for amino-  
362 acids and purines metabolism making possible the phagosomes formation [48]. Autophagia  
363 renders biomass bricks or stress response molecules synthesis (i.e., amino acids generation  
364 by proteolysis, recycling and protein synthesis for fueling other pathways (TCA)), when  
365 basal or other metabolites are not available (Formation of metabolic precursors, RAB).  
366 With this information, a proteomic signature for T98G and another for U87MG was  
367 proposed, defining concrete cell processes and temporality. Unlike other protein signatures  
368 which look for more straight aims, like biomarkers search using other biological models  
369 (plasma or cerebrospinal liquid proteins) where proteins surpassing significant abundance  
370 changes and overseeing some cellular process, resulting in inadequate descriptions [49,50].

371

## 372 **Conclusions**

373 The random sampling of spots and their abundance PCA before protein  
374 identification are tools that allow us to see a fine landscape of the most relevant biological  
375 process or functions in each cell type or glioma carcinogenesis state; with this information  
376 we are able to build a representative mitochondrial proteomic signature specific for T98G  
377 and U87MG glioblastoma cell lines, where overrepresented biological processes are  
378 highlighted with whole mitochondrial proteins identified. This signature shows a clear  
379 difference between two glioblastoma stages, one with mitochondrial type (OXPHOS)

380 metabolism and, the other, a glycolytic, more aggressive, invasive and metastatic cancer  
381 type.

382 Our data match with the notion of mitochondria as a dynamic organelle following  
383 and sensing the molecular events taking place during carcinogenesis. Through this close  
384 relationship is possible to take a temporal picture of cancer stages or types. It also shows  
385 that a well-selected spot sample and a correct data analysis of mitochondrial proteome can  
386 define the biological events succeeding in cellular transformation. Thus, the notion that  
387 T98G could represent an earlier glioblastoma state bring the opportunity to focus in an  
388 earlier cancer-related events, such as apoptosis evasion, and target the chaperone system as  
389 a therapeutic diana to avoid cancer development.

390

### 391 **Acknowledgments**

392 We are grateful to Dr. Hector Vargas for insightful discussion. This paper  
393 constitutes a partial fulfillment of the Post-Graduate Program in Biological Sciences of the  
394 Universidad Nacional Autónoma de México (UNAM). Leopoldo Gómez-Caudillo  
395 acknowledges to Consejo Nacional de Ciencia y Tecnología (CONACyT) for the  
396 scholarship No. 375815, and to Instituto Mexicano del Seguro Social (IMSS)  
397 (FIS/IMSS/PROT/G13/1206). This work was supported in part by Consejo Nacional de  
398 Ciencia y Tecnología (CONACyT) Grant 220790 and Dirección General de Asuntos del  
399 Personal Académico-Programa de Apoyo a Proyectos de Investigación e Innovación  
400 Tecnológica, Grant IN213216.

401

### 402 **References**

403 [1] B. Luna, S. Bhatia, C. Yoo, Q. Felty, D.I. Sandberg, M. Duchowny, Z. Khatib, I.

- 404 Miller, J. Ragheb, J. Prasanna, D. Roy, Proteomic and Mitochondrial Genomic  
405 Analyses of Pediatric Brain Tumors, *Mol. Neurobiol.* 52 (2014) 1341–1363.  
406 doi:10.1007/s12035-014-8930-3.
- 407 [2] M. Pooladi, M. Rezaei-tavirani, M. Hashemi, S. Hesami-tackallou, Cluster and  
408 Principal Component Analysis of Human Glioblastoma Multiforme ( GBM ) Tumor  
409 Proteome, (2014) 87–95.
- 410 [3] J. Fangusaro, Pediatric high grade glioma: a review and update on tumor clinical  
411 characteristics and biology., *Front. Oncol.* 2 (2012) 1–10.  
412 doi:10.3389/fonc.2012.00105.
- 413 [4] J. Kalinina, J. Peng, J.C. Ritchie, E.G. Van Meir, Proteomics of gliomas: Initial  
414 biomarker discovery and evolution of technology, *Neuro. Oncol.* 13 (2011) 926–942.  
415 doi:10.1093/neuonc/nor078.
- 416 [5] H. Hagberg, C. Mallard, C.I. Rousset, C. Thornton, Mitochondria: Hub of injury  
417 responses in the developing brain, *Lancet Neurol.* 13 (2014) 217–232.  
418 doi:10.1016/S1474-4422(13)70261-8.
- 419 [6] D. Hanahan, R.A. Weinberg, Hallmarks of cancer: the next generation., *Cell.* 144  
420 (2011) 646–74. doi:10.1016/j.cell.2011.02.013.
- 421 [7] S.L. Floor, J.E. Dumont, C. Maenhaut, E. Raspe, Hallmarks of cancer: Of all cancer  
422 cells, all the time?, *Trends Mol. Med.* 18 (2012) 509–515.  
423 doi:10.1016/j.molmed.2012.06.005.
- 424 [8] A.M. Czarnecka, J.S. Czarnecki, W. Kukwa, F. Cappello, A. Ścińska, A. Kukwa,  
425 Molecular oncology focus - Is carcinogenesis a “mitochondriopathy”?, *J. Biomed.*  
426 *Sci.* 17 (2010) 31. doi:10.1186/1423-0127-17-31.
- 427 [9] G. Kroemer, J. Pouyssegur, Tumor Cell Metabolism: Cancer’s Achilles’ Heel,

- 428 Cancer Cell. 13 (2008) 472–482. doi:10.1016/j.ccr.2008.05.005.
- 429 [10] L. Galluzzi, E. Morselli, O. Kepp, I. Vitale, A. Rigoni, E. Vacchelli, M. Michaud, H.  
430 Zischka, M. Castedo, G. Kroemer, Mitochondrial gateways to cancer, Mol. Aspects  
431 Med. 31 (2010) 1–20. doi:10.1016/j.mam.2009.08.002.
- 432 [11] S. Vyas, E. Zaganjor, M.C. Haigis, Mitochondria and Cancer, Cell. 166 (2016) 555–  
433 566. doi:10.1016/j.cell.2016.07.002.
- 434 [12] J. Petrak, R. Ivanek, O. Toman, R. Cmejla, J. Cmejlova, D. Vyoral, J. Zivny, C.D.  
435 Vulpe, Déjà vu in proteomics. A hit parade of repeatedly identified differentially  
436 expressed proteins, Proteomics. 8 (2008) 1744–1749. doi:10.1002/pmic.200700919.
- 437 [13] R.F. Deighton, R. McGregor, J. Kemp, J. McCulloch, I.R. Whittle, Glioma  
438 pathophysiology: Insights emerging from proteomics, Brain Pathol. 20 (2010) 691–  
439 703. doi:10.1111/j.1750-3639.2010.00376.x.
- 440 [14] L. Valledor, J. Jorrín, Back to the basics: Maximizing the information obtained by  
441 quantitative two dimensional gel electrophoresis analyses by an appropriate  
442 experimental design and statistical analyses, J. Proteomics. 74 (2011) 1–18.  
443 doi:10.1016/j.jprot.2010.07.007.
- 444 [15] E. Obre, R. Rossignol, Emerging concepts in bioenergetics and cancer research:  
445 Metabolic flexibility, coupling, symbiosis, switch, oxidative tumors, metabolic  
446 remodeling, signaling and bioenergetic therapy, Int. J. Biochem. Cell Biol. 59 (2015)  
447 167–181. doi:10.1016/j.biocel.2014.12.008.
- 448 [16] S. Encarnación, M. Hernández, G. Martínez-Batallar, S. Contreras, M.D.C. Vargas,  
449 J. Mora, Comparative proteomics using 2-D gel electrophoresis and mass  
450 spectrometry as tools to dissect stimulons and regulons in bacteria with sequenced or  
451 partially sequenced genomes., Biol. Proced. Online. 7 (2005) 117–135.

- 452           doi:10.1251/bpo110.
- 453   [17]   E. Salazar, J. Javier Díaz-Mejía, G. Moreno-Hagelsieb, G. Martínez-Batallar, Y.  
454           Mora, J. Mora, S. Encarnación, Characterization of the Nif A-RpoN regulon in  
455           rhizobium etli in free life and in symbiosis with phaseolus vulgaris, Appl. Environ.  
456           Microbiol. 76 (2010) 4510–4520. doi:10.1128/AEM.02007-09.
- 457   [18]   R Core Team, R: A Language and Environment for Statistical Computing, (2017).  
458           <https://www.r-project.org/>.
- 459   [19]   R. (Roger) Mead, R.N. Curnow, A.M. Hasted, Statistical methods in agriculture and  
460           experimental biology, Third Edit, Chapman & Hall/CRC, New York, NY, 2003.  
461           [https://www.crcpress.com/Statistical-Methods-in-Agriculture-and-Experimental-](https://www.crcpress.com/Statistical-Methods-in-Agriculture-and-Experimental-Biology-Third-Edition/Mead-Curnow-Hasted/p/book/9781584881872?source=igodigital)  
462           Biology-Third-Edition/Mead-Curnow-  
463           Hasted/p/book/9781584881872?source=igodigital (accessed July 17, 2017).
- 464   [20]   A. Liaw, M. Wiener, Classification and Regression by randomForest, R News. 2  
465           (2002) 18–22. <http://cran.r-project.org/doc/Rnews/>.
- 466   [21]   S. Dray, A.B. Dufour, D. Chessel, The ade4 package-`{II}`: `{T}`wo-table and `{K}`-  
467           table methods., R News. 7 (2007) 47–52.
- 468   [22]   H. Abdi, L.J. Williams, Principal component analysis, Wiley Interdiscip. Rev.  
469           Comput. Stat. 2 (2010) 433–459. doi:10.1002/wics.101.
- 470   [23]   D. Perkins, D. Pappin, D. Creasy, J. Cottrell, Probability-based protein identification  
471           by searching sequence databases using mass spectrometry data., Electrophoresis. 20  
472           (1999) 3551–3567. doi:10.1002/(SICI)1522-2683(19991201)20:18<3551::AID-  
473           ELPS3551>3.0.CO;2-2.
- 474   [24]   UniProt: the universal protein knowledgebase, Nucleic Acids Res. 45 (2017) D158–  
475           D169. doi:10.1093/nar/gkw1099.

- 476 [25] J.A. Vizcaíno, A. Csordas, N. Del-Toro, J.A. Dienes, J. Griss, I. Lavidas, G. Mayer,  
477 Y. Perez-Riverol, F. Reisinger, T. Ternent, Q.W. Xu, R. Wang, H. Hermjakob, 2016  
478 update of the PRIDE database and its related tools, *Nucleic Acids Res.* 44 (2016)  
479 D447–D456. doi:10.1093/nar/gkv1145.
- 480 [26] A.C. Smith, J.A. Blackshaw, A.J. Robinson, MitoMiner: A data warehouse for  
481 mitochondrial proteomics data, *Nucleic Acids Res.* 40 (2012) 1–8.  
482 doi:10.1093/nar/gkr1101.
- 483 [27] D. Szklarczyk, J.H. Morris, H. Cook, M. Kuhn, S. Wyder, M. Simonovic, A. Santos,  
484 N.T. Doncheva, A. Roth, P. Bork, L.J. Jensen, C. von Mering, The STRING  
485 database in 2017: quality-controlled protein–protein association networks, made  
486 broadly accessible, *Nucleic Acids Res.* 45 (2017) D362–D368.  
487 doi:10.1093/nar/gkw937.
- 488 [28] M. Ashburner, C.A. Ball, J.A. Blake, D. Botstein, H. Butler, J.M. Cherry, A.P.  
489 Davis, K. Dolinski, S.S. Dwight, J.T. Eppig, M.A. Harris, D.P. Hill, L. Issel-Tarver,  
490 A. Kasarskis, S. Lewis, J.C. Matese, J.E. Richardson, M. Ringwald, G.M. Rubin, G.  
491 Sherlock, G. Sherlock, Gene ontology: tool for the unification of biology. The Gene  
492 Ontology Consortium., *Nat. Genet.* 25 (2000) 25–9. doi:10.1038/75556.
- 493 [29] M. Ashkenazi, G.D. Bader, A. Kuchinsky, M. Moshelion, D.J. States, Cytoscape  
494 ESP: Simple search of complex biological networks, *Bioinformatics.* 24 (2008)  
495 1465–1466. doi:10.1093/bioinformatics/btn208.
- 496 [30] S. Maere, K. Heymans, M. Kuiper, BiNGO: a Cytoscape plugin to assess  
497 overrepresentation of Gene Ontology categories in Biological Networks,  
498 *Bioinformatics.* 21 (2005) 3448–3449. doi:10.1093/bioinformatics/bti551.
- 499 [31] U.K. Laemmli, Cleavage of Structural Proteins during the Assembly of the Head of

- 500 Bacteriophage T4, *Nature*. 227 (1970) 680–685. doi:10.1038/227680a0.
- 501 [32] H. Towbin, T. Staehelin, J. Gordon, Electrophoretic transfer of proteins from  
502 polyacrylamide gels to nitrocellulose sheets: procedure and some applications., *Proc.*  
503 *Natl. Acad. Sci. U. S. A.* 76 (1979) 4350–4.  
504 <http://www.ncbi.nlm.nih.gov/pubmed/388439> (accessed October 1, 2017).
- 505 [33] M. Safran, I. Dalah, J. Alexander, N. Rosen, T. Iny Stein, M. Shmoish, N. Nativ, I.  
506 Bahir, T. Doniger, H. Krug, A. Sirota-Madi, T. Olender, Y. Golan, G. Stelzer, A.  
507 Harel, D. Lancet, GeneCards Version 3: the human gene integrator., *Database*  
508 (Oxford). 2010 (2010) baq020. doi:10.1093/database/baq020.
- 509 [34] Y. Iwadate, T. Sakaida, T. Hiwasa, Y. Nagai, H. Ishikura, M. Takiguchi, A.  
510 Yamaura, Molecular classification and survival prediction in human gliomas based  
511 on proteome analysis., *Cancer Res.* 64 (2004) 2496–501.  
512 <http://www.ncbi.nlm.nih.gov/pubmed/15059904> (accessed July 2, 2015).
- 513 [35] B.B. Ordys, S. Launay, R.F. Deighton, J. McCulloch, I.R. Whittle, The role of  
514 mitochondria in glioma pathophysiology, *Mol. Neurobiol.* 42 (2010) 64–75.  
515 doi:10.1007/s12035-010-8133-5.
- 516 [36] B. Collet, N. Guitton, S. Saïkali, T. Avril, C. Pineau, A. Hamlat, J. Mosser, V.  
517 Quillien, Differential analysis of glioblastoma multiforme proteome by a 2D-DIGE  
518 approach., *Proteome Sci.* 9 (2011) 16. doi:10.1186/1477-5956-9-16.
- 519 [37] J.M. Cuezva, A.D. Ortega, I. Willers, L. Sánchez-Cenizo, M. Aldea, M. Sánchez-  
520 Aragón, The tumor suppressor function of mitochondria: translation into the clinics.,  
521 *Biochim. Biophys. Acta.* 1792 (2009) 1145–58. doi:10.1016/j.bbadis.2009.01.006.
- 522 [38] M.D. Siegelin, J. Plescia, C.M. Raskett, C.A. Gilbert, A.H. Ross, D.C. Altieri,  
523 Global Targeting of Subcellular Heat Shock Protein-90 Networks for Therapy of

- 524 Glioblastoma, *Mol. Cancer Ther.* 9 (2010) 1638–1646. doi:10.1158/1535-  
525 7163.MCT-10-0097.
- 526 [39] D.A. Wolf, Is reliance on mitochondrial respiration a “chink in the  
527 armor” of therapy-resistant cancer?, *Cancer Cell.* 26 (2014) 788–795.  
528 doi:10.1016/j.ccell.2014.10.001.
- 529 [40] C. Jose, N. Bellance, R. Rossignol, Choosing between glycolysis and oxidative  
530 phosphorylation: A tumor’s dilemma?, *Biochim. Biophys. Acta - Bioenerg.* 1807  
531 (2011) 552–561. doi:10.1016/j.bbabbio.2010.10.012.
- 532 [41] A. Ramão, M. Gimenez, H.J. Laure, C. Izumi, R.C.S. Vida, S. Oba-Shinjo, S.K.  
533 Marie, J.C. Rosa, Changes in the expression of proteins associated with aerobic  
534 glycolysis and cell migration are involved in tumorigenic ability of two glioma cell  
535 lines, *Proteome Sci.* 10 (2012) 53. doi:10.1186/1477-5956-10-53.
- 536 [42] M. Pooladi, S.K.R. Abad, M. Hashemi, Proteomics analysis of human brain glial cell  
537 proteome by 2D gel., *Indian J. Cancer.* 51 (2014) 159–62. doi:10.4103/0019-  
538 509X.138271.
- 539 [43] H.N. Banerjee, K. Mahaffey, E. Riddick, A. Banerjee, N. Bhowmik, M. Patra,  
540 Search for a diagnostic/prognostic biomarker for the brain cancer glioblastoma  
541 multiforme by 2D-DIGE-MS technique., *Mol. Cell. Biochem.* 367 (2012) 59–63.  
542 doi:10.1007/s11010-012-1319-6.
- 543 [44] G. Karpel-Massler, C.T. Ishida, E. Bianchetti, C. Shu, R. Perez-Lorenzo, B. Horst,  
544 M. Banu, K.A. Roth, J.N. Bruce, P. Canoll, D.C. Altieri, M.D. Siegelin, Inhibition of  
545 Mitochondrial Matrix Chaperones and Antiapoptotic Bcl-2 Family Proteins  
546 Empower Antitumor Therapeutic Responses., *Cancer Res.* 77 (2017) 3513–3526.  
547 doi:10.1158/0008-5472.CAN-16-3424.



- 548 [45] J.-I. CHAE, Y.-J. JEON, J.-H. SHIM, Downregulation of Sp1 is involved in  
549 honokiol-induced cell cycle arrest and apoptosis in human malignant pleural  
550 mesothelioma cells, *Oncol. Rep.* 29 (2013) 2318–2324. doi:10.3892/or.2013.2353.
- 551 [46] E. White, Deconvoluting the context-dependent role for autophagy in cancer, *Nat.*  
552 *Rev. Cancer.* 12 (2012) 401–410. doi:10.1038/nrc3262.
- 553 [47] A. Giatromanolaki, E. Sivridis, A. Mitrakas, D. Kalamida, C.E. Zois, S. Haider, C.  
554 Piperidou, A. Pappa, K.C. Gatter, A.L. Harris, M.I. Koukourakis, Autophagy and  
555 lysosomal related protein expression patterns in human glioblastoma., *Cancer Biol.*  
556 *Ther.* 15 (2014) 1468–78. doi:10.4161/15384047.2014.955719.
- 557 [48] V. Sica, L. Galluzzi, J.M. Bravo-San Pedro, V. Izzo, M.C. Maiuri, G. Kroemer,  
558 Organelle-Specific Initiation of Autophagy, *Mol. Cell.* 59 (2015) 522–539.  
559 doi:10.1016/j.molcel.2015.07.021.
- 560 [49] P. Gautam, S.C. Nair, M.K. Gupta, R. Sharma, R.V. Polisetty, M.S. Uppin, C.  
561 Sundaram, A.K. Puligopu, P. Ankathi, A.K. Purohit, G.R. Chandak, H.C. Harsha, R.  
562 Sirdeshmukh, Proteins with Altered Levels in Plasma from Glioblastoma Patients as  
563 Revealed by iTRAQ-Based Quantitative Proteomic Analysis, *PLoS One.* 7 (2012).  
564 doi:10.1371/journal.pone.0046153.
- 565 [50] J.W. Locasale, T. Melman, S. Song, X. Yang, K.D. Swanson, L.C. Cantley, E.T.  
566 Wong, J.M. Asara, Metabolomics of Human Cerebrospinal Fluid Identifies  
567 Signatures of Malignant Glioma, *Mol. Cell. Proteomics.* 11 (2012) M111.014688.  
568 doi:10.1074/mcp.M111.014688.
- 569
- 570
- 571

572 Figure Legends.

573

574 Fig. 1- PCA analysis was done on spot abundance to get 5 PCs explaining the total  
575 variation in the data (A). As PC1 explains 63% of whole variance and is located to the left  
576 of inflection point in the Scree plot line (B). Thus, PC1 scores for all gels (C) distinguishes  
577 between experimental groups. Finally, average abundance profile plot (D) shows the  
578 behavior of significant spots in PC1, with positive correlation between spots and PC1 (dot  
579 line), others with negative one (solid line); suggesting a molecular transition.

580

581 Fig. 2 – Mitochondrial proteome distribution in T98G (A) and U87MG (B) gels of  
582 identified proteins, and their cell localization (C) as result of random sampling and PCA.  
583 Circles in blue, blue light, red and orange are specific and overexpressed proteins in T98G  
584 and specific and overexpressed proteins in U87MG respectively. Cell localization was  
585 obtained according MitoMiner database and GeneCard Suite. Cytoskeleton (Ce),  
586 Cytoplasm (Cp), Endoplasmic Reticulum (ER), Endosome (Es), Exosome(Exs), Golgi  
587 Apparatus (G), Lysosome (Ls), Melanosome (Ms), Membrane (M), Mitochondria (Mt) and  
588 Nucleus (N).

589

590 Fig. 3 – The biological processes of each glioblastoma cell line is shown by colors. The  
591 processes were obtained by protein aggregation (squares) from T98G (A) and U87MG (B)  
592 initial PPI networks (circles). The size of the circles (small, medium and large) represents  
593 the relative abundance (low, regular and high, respectively) of proteins.

594

595 Fig. 4 – OXPHOS validation (A) and bioenergetic signature (B). To the left in figure the  
596 expression bands obtained by western blot are observed. To the right is plotted the average  
597 and 95% average confidence interval of density bands, calculated by triplicate for each  
598 complex,  $\beta$ -ATPase and GAPDH.

599

600 Fig. 5 – Proteomic signature generated with the mean abundance profile of the three  
601 replicates of T98G (solid line) and U87MG (dot line). Colors locate the proteins in the main  
602 biological processes identified for each cell line.

Figure 1

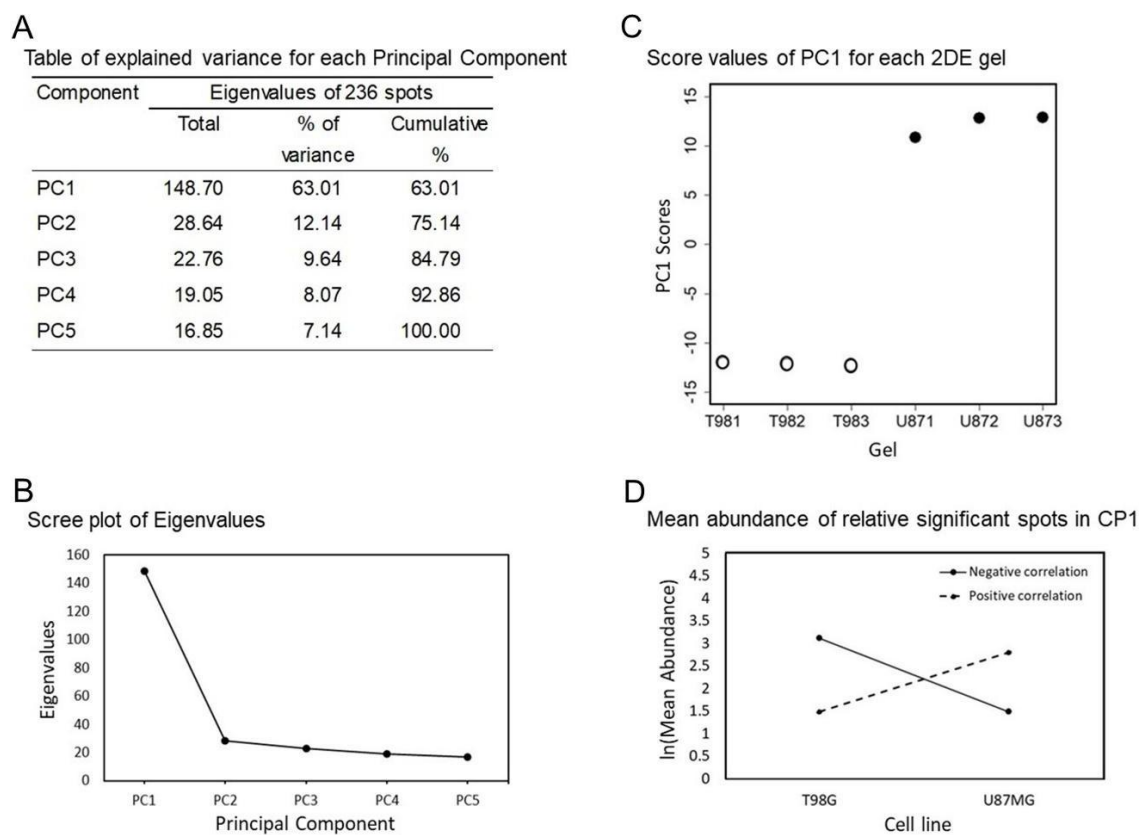

Figure 2

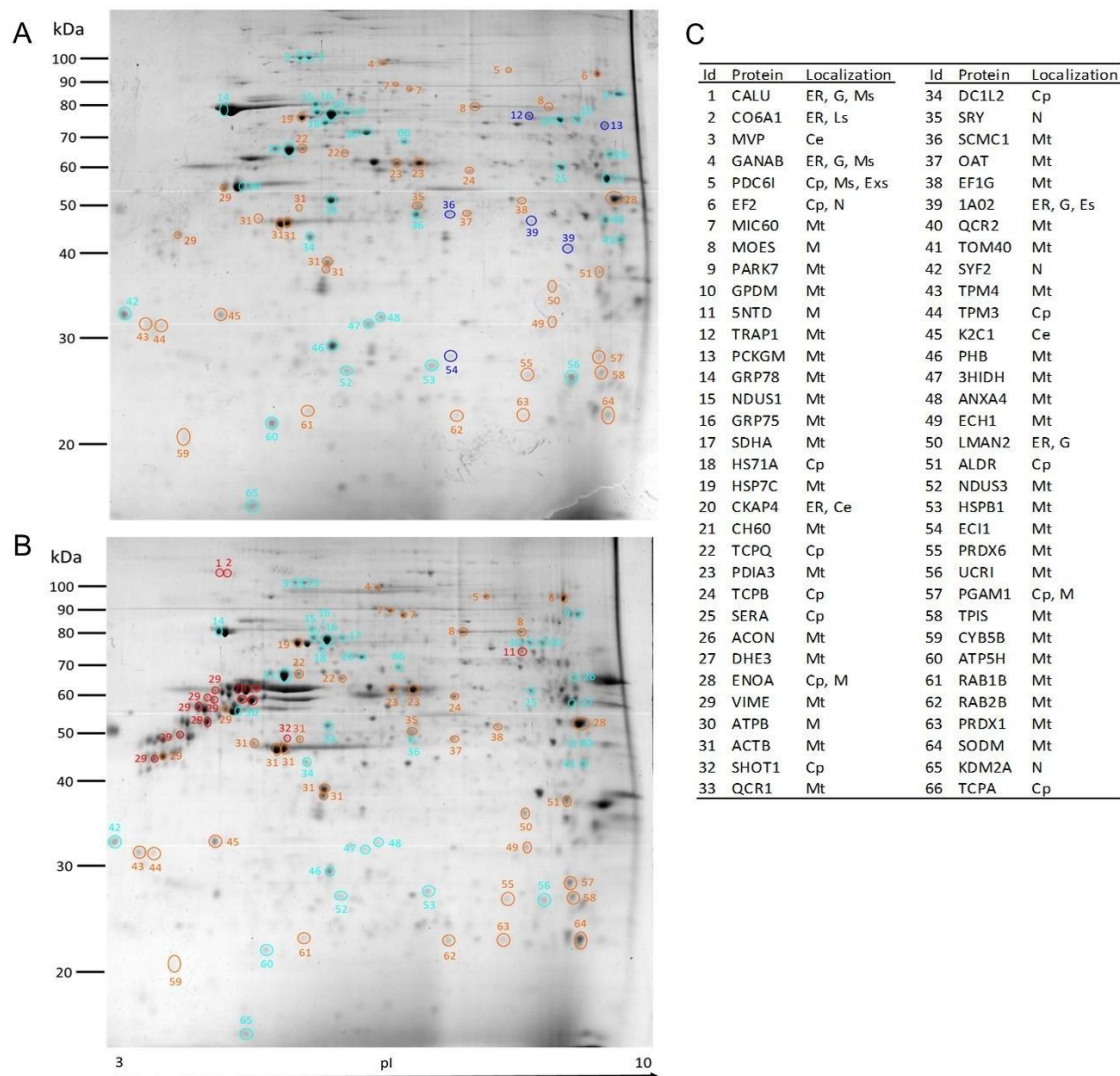

Figure 3

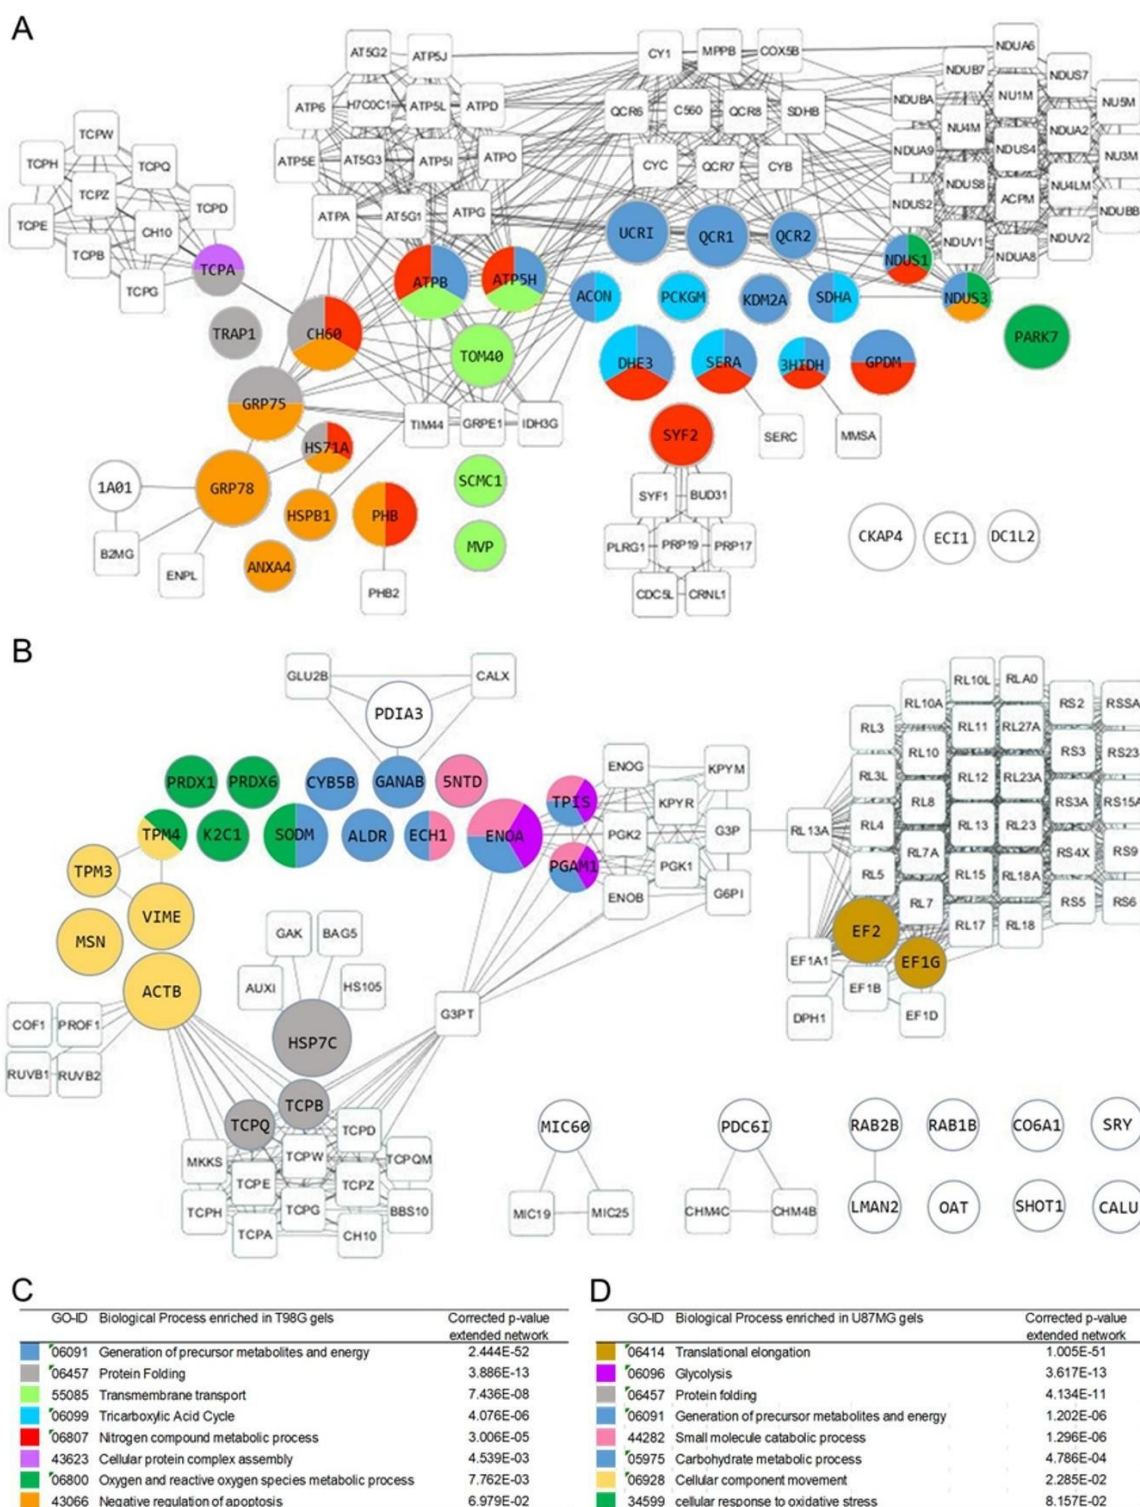

Figure 4.

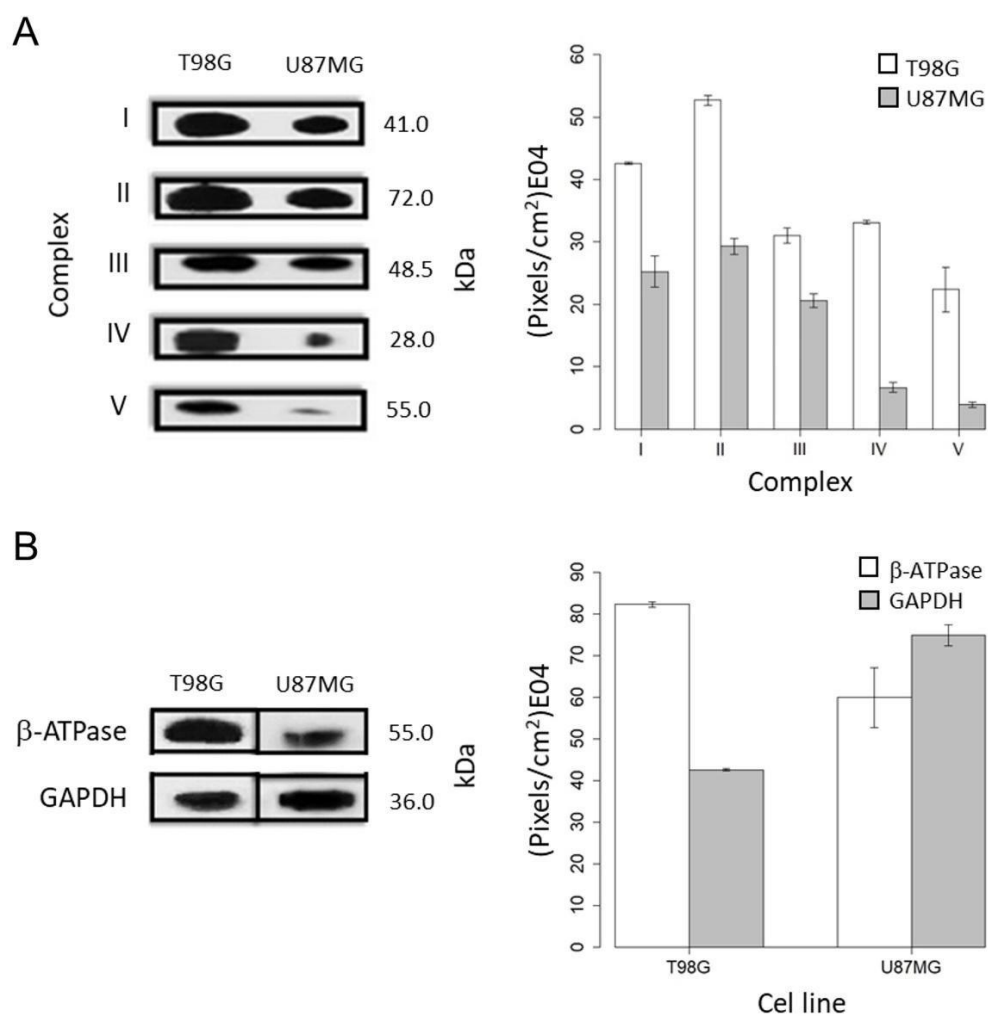



Figure 5.

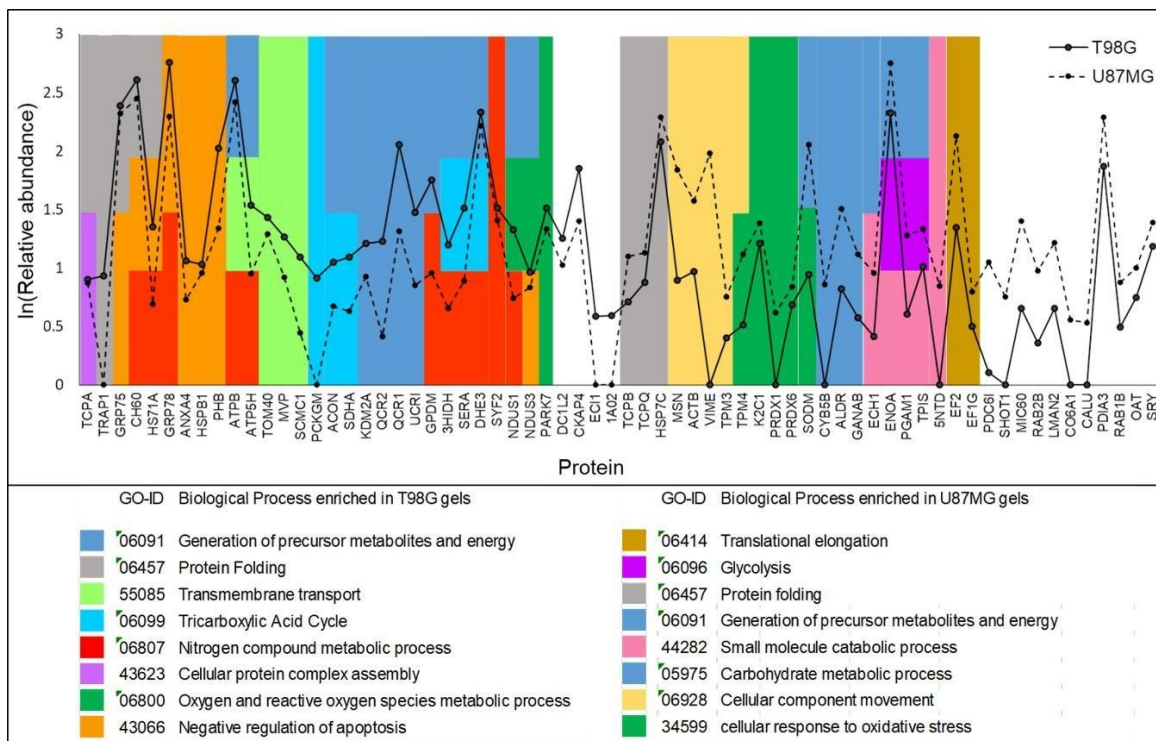

Source: http://biorxiv.org/content/10.1101/270942v1.full.pdf
